# Supplementary material
Source: PubMed Central journal article supplement (PMC3993069)
Supplement: Supp_Fig1.pdf [file Supp_Fig1.pdf]

## Supplementary Data

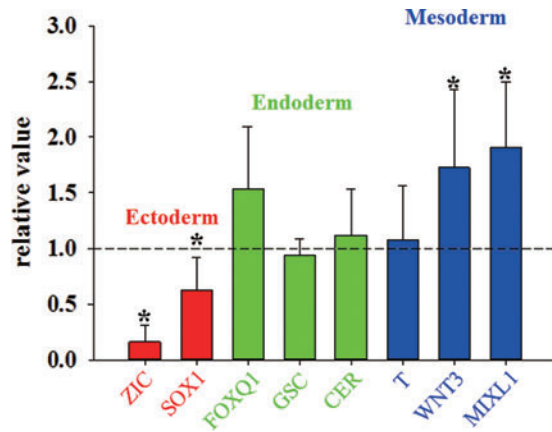

**SUPPLEMENTARY FIG. S1.** Enhanced mesodermal lineage induction of hiPSC EBs through the treatment of the EBs with the hMSC-CM for 4 days. The gene expressions of mesodermal (*T*, *WNT3*, and *MIXL1*), endodermal (*FOXQ1*, *GSC*, and *CER*), and ectodermal (*ZIC1* and *SOX1*) of hMSC-CM-treated EBs (hMSC-CM EBs) were determined by qRT-PCR and normalized to the levels of the untreated EB group ( $n=4$ ,  $*p < 0.05$  vs. untreated EB). CM, conditioned medium; EB, embryoid body; hiPSC, human induced pluripotent stem cell; hMSC, human mesenchymal stem cell; qRT-PCR, quantitative real-time reverse transcription-polymerase chain reaction.
