# Supplementary material
Source: PubMed Central journal article supplement (PMC3993069)
Supplement: Supp_Fig2.pdf [file Supp_Fig2.pdf]

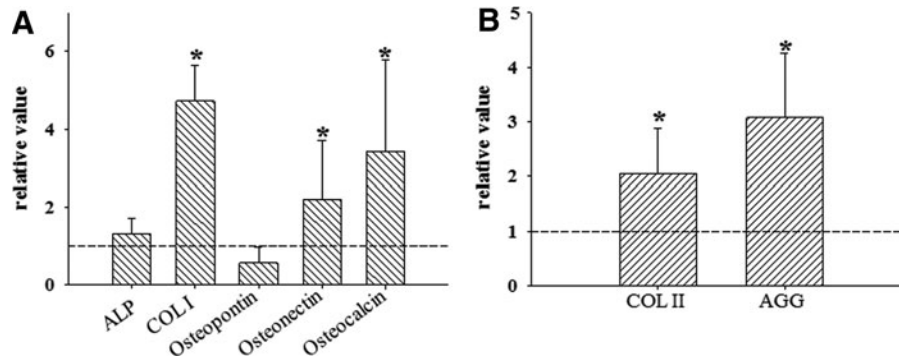

**SUPPLEMENTARY FIG. S2.** Enhanced osteogenic and chondrogenic differentiation of mesodermal lineage-induced hiPSCs at day 14. The mRNA expressions of **(A)** osteogenic differentiation markers in osteogenic differentiation-induced hMSC-CM hiPSCs and **(B)** chondrogenic differentiation markers in chondrogenic differentiation-induced hMSC-CM hiPSCs were determined using qRT-PCR and normalized to the levels of the osteogenic or chondrogenic differentiation-induced, untreated hESCs. \* $p < 0.05$  versus untreated hiPSCs. hESC, human embryonic stem cell.
